# Supplementary material for: Drosophila Ana1 is required for centrosome assembly and centriole elongation
Source: Oxford University Press journal article supplement (doi:10.1242/jcs.186460), 2016-05-23
Supplement: jcs186460supp.pdf [file jcs186460supp.pdf]

## Supplementary Material

**A**

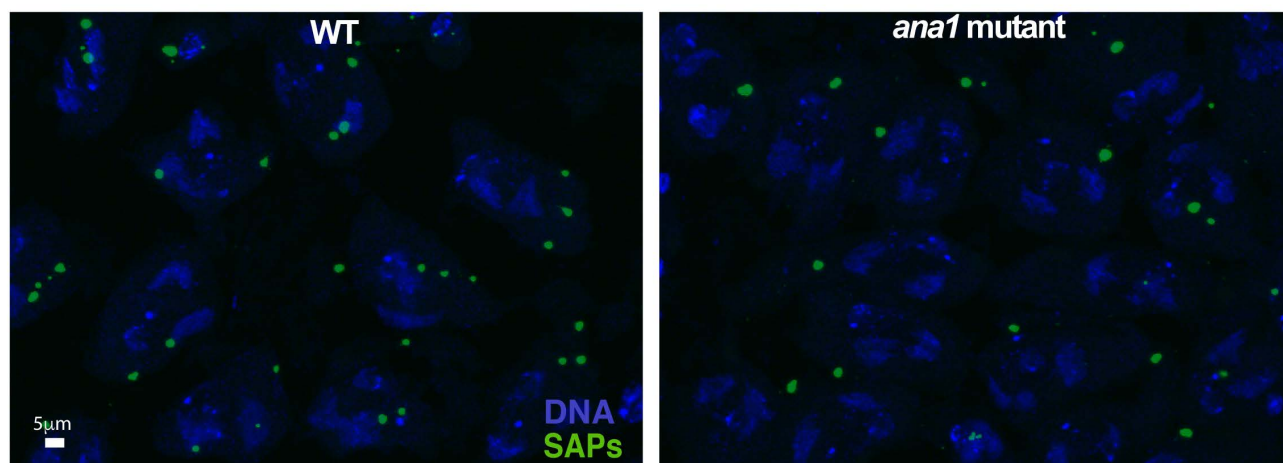

**B**

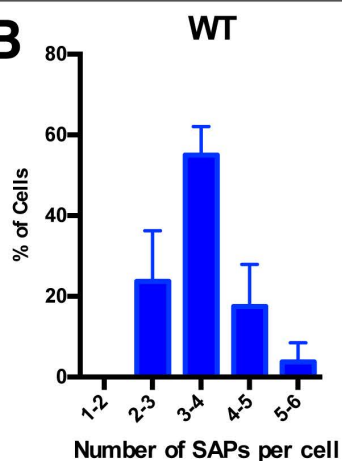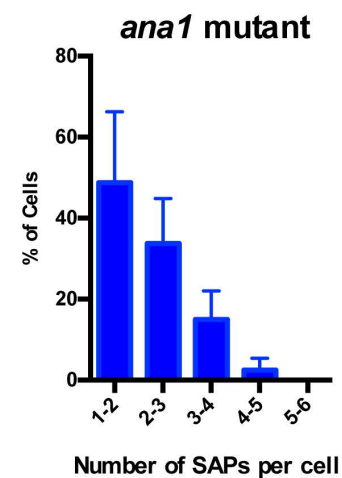

**C**

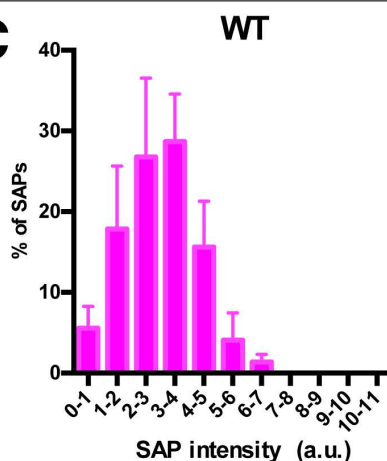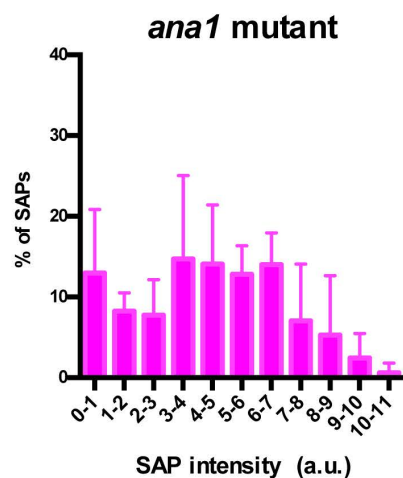

**D**

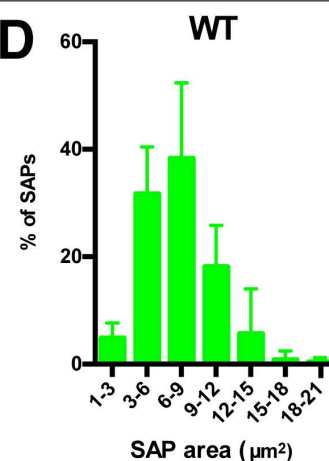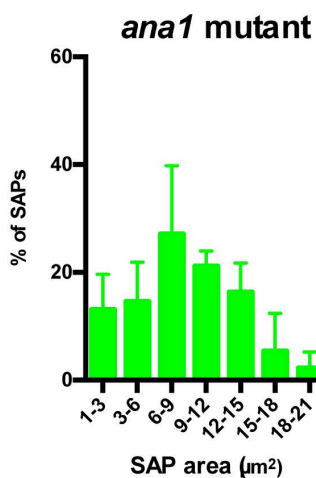

### **Figure S1**

**SAP assembly is subtly altered in the absence of Ana1. (A)** Micrographs show SAPs (*green*) in primary spermatocytes from WT (left panel) or *ana1* mutant (right panel) *Drosophila* late pupal testes. The tissue was stained with Hoechst to stain the DNA (*blue*). **(B-D)** Graphs quantify the number of SAPs per cell (B), the sum SAP fluorescence intensity (C), and the average area of SAPs per cell in WT (top graphs) or *ana1* mutant (bottom graphs) spermatocytes. These data show that SAPs are less abundant and larger than normal in *ana1* mutant spermatocytes. Error bars represent SD. N=20 spermatocytes per testis and 4 testes per genotype.

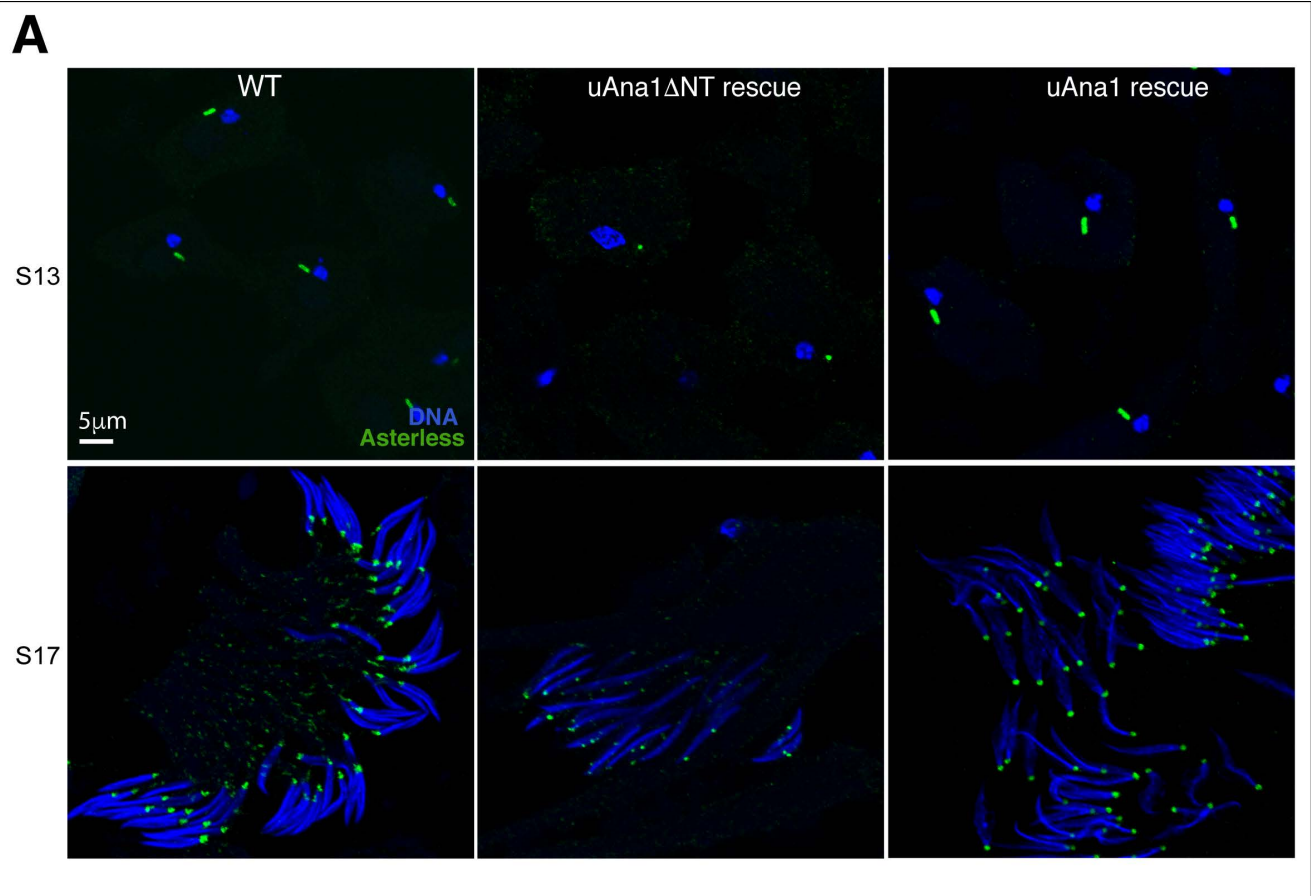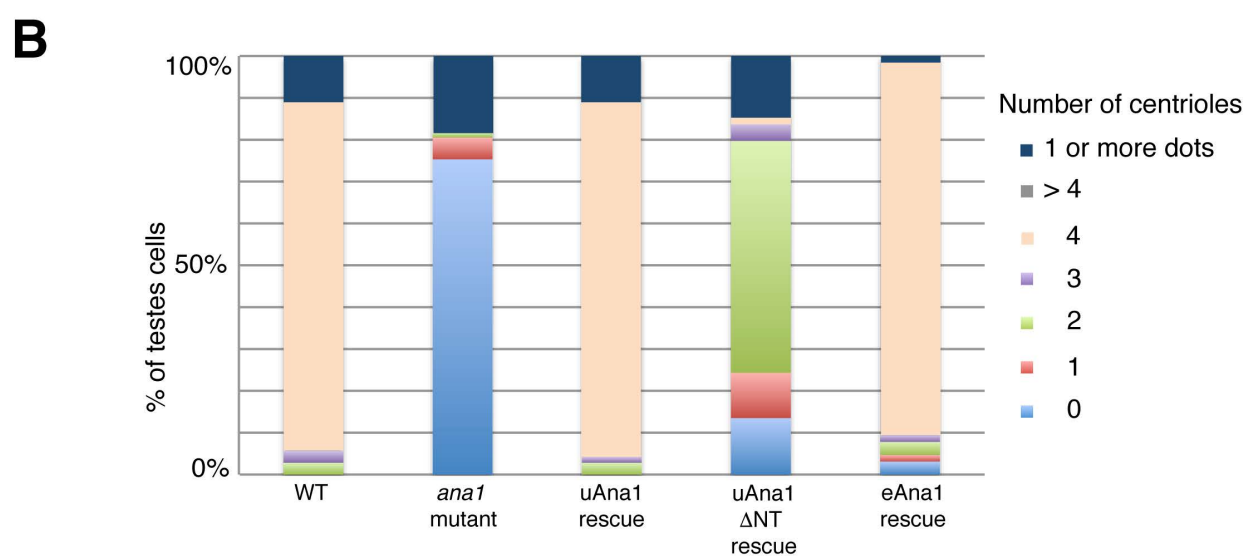

## **Figure S2**

**Ana1 levels influence centriole length. (A)** Micrographs show *Drosophila* early S13 spermatids (top panels) at the onion stage (before axoneme formation) or S17 spermatids (bottom panels) during the process of axoneme elongation. Cells were stained for DNA (*blue*) and Asterless (centriole/basal body marker) (*green*) from WT (left panels) or *ana1* mutant rescued with either uGFP-Ana1 $\Delta$ NT (middle panels) or uGFP-Ana1 (right panels). Note the non-elongated dot-like centrioles/basal bodies in the mutant cells rescued with uGFP-Ana1 $\Delta$ NT. **(B)** Graphs illustrate the quantification of the percentage of primary spermatocytes of *Drosophila* late pupal testes exhibiting different numbers of centrosomes (n=62 total cells from 5 different testes) in WT, *ana1* mutant, *ana1* mutant rescued by the different transgenes (as indicated). Note that in primary spermatocytes there are normally 4 elongated centrioles per cell, but in the *ana1* mutants rescued by GFP-Ana1 $\Delta$ NT the centrioles were so short that the centriole pair could no longer be resolved, and so we counted these as 2 centrioles per cell (see Figure 7). Note also that we scored for the presence of occasional dot-like structures (“dots”) that were stained by both Asl and Cnn antibodies.

**Table S1, related to materials and methods**

|    | <b>Commercial Antibodies</b>                                 | <b>Catalogue number</b> |
|----|--------------------------------------------------------------|-------------------------|
| 1  | Mouse anti- $\alpha$ -tubulin (DM1 $\alpha$ ; Sigma-Aldrich) | T9026                   |
| 2  | Anti-Rabbit IgG Alexa Fluor® 405 (Invitrogen)                | A31556                  |
| 3  | Anti-Guinea pig IgG Alexa Fluor® 488 (Invitrogen)            | A11073                  |
| 4  | Anti-Rabbit IgG Alexa Fluor® 488 (Invitrogen)                | A21206                  |
| 5  | Anti-rabbit IgG Alexa Fluor® 568 (Invitrogen)                | A11011                  |
| 6  | Anti-Mouse IgG Alexa Fluor® 568 (Invitrogen)                 | A11004                  |
| 7  | Anti-Guinea Pig IgG Alexa Flour 594 (Invitrogen)             | A11076                  |
| 8  | Anti-Sheep IgG Alexa Fluor® 647 (Invitrogen)                 | A21448                  |
| 9  | Anti-Mouse IgG Alexa Fluor® 647 (Invitrogen)                 | A21236                  |
| 10 | GFP-booster-atto488 (ChromoTek)                              | gba488                  |
| 11 | Anti Rabbit HRP conjugated (GE Healthcare)                   | NA934V                  |
| 12 | Anti Mouse HRP conjugated (GE Healthcare)                    | NA931V                  |
